# Supplementary material
Source: PubMed Central journal article supplement (PMC5495631)

**Supplementary Figure 1: IAPP<sup>+/+</sup> x APP double transgenic mice exhibit more IAPP deposits in the pancreas than controls.** IAPP pancreatic burden was evaluated by quantifying the immuno-stained area using a specific antibody for the human sequence of IAPP. **A:** Representative pictures of immunofluorescent IAPP deposits in the pancreatic islets of IAPP<sup>+/+</sup> x APP, IAPP<sup>+/-</sup> x APP, IAPP<sup>+/+</sup>, and IAPP<sup>+/-</sup> mice. Scale bar 50  $\mu$ m. **B:** The load of IAPP deposits was quantified as the immune-reactive area per total area analyzed in the islets of Langerhans. Data was analyzed by one-way ANOVA, followed by the Tukey's multiple comparison post-hoc test. \*p<0.05; \*\*\*p<0.001. n=5-10 animals/group; 5 sections/animal.

**Supplementary Figure 2. Characterization of IAPP deposits in IAPP<sup>+/+</sup> mice.** Representative pictures of pancreatic tissue utilized for exogenous seeding experiments double stained with anti-IAPP antibody (in red) and Thioflavin S (in green) in IAPP animals (**A1-A3**) and wild-type animals treated with STZ to induce T1D model (**B1-B3**). While the IAPP T2D model shows immune-reactivity for IAPP and is co-stained with ThS (merge), indicating the fibrillar nature of misfolded IAPP, no IAPP staining or fibrillar structures were observed in T1D-induced pancreas. Scale bar: 50 $\mu$ m.

Suppl. Fig. 1

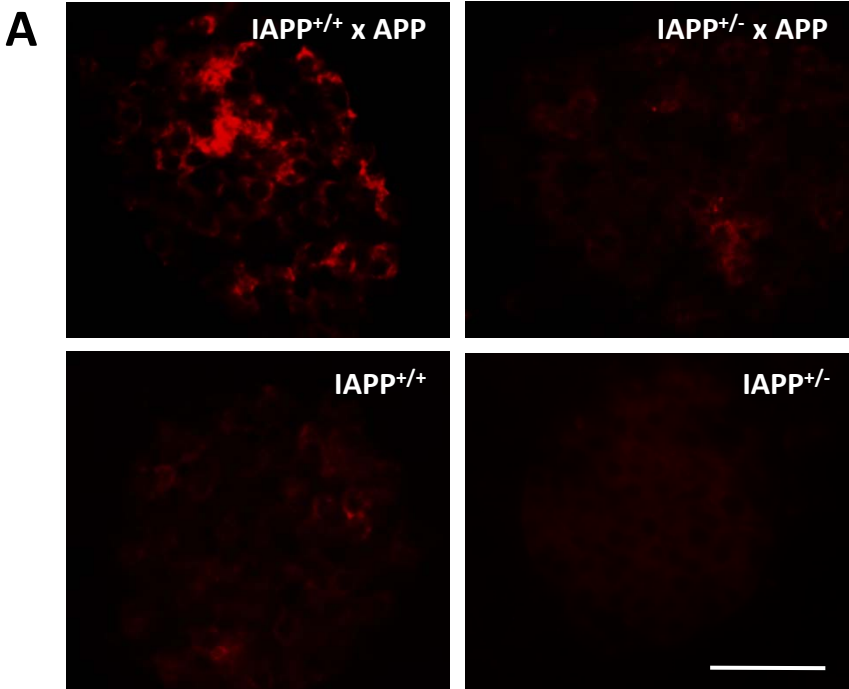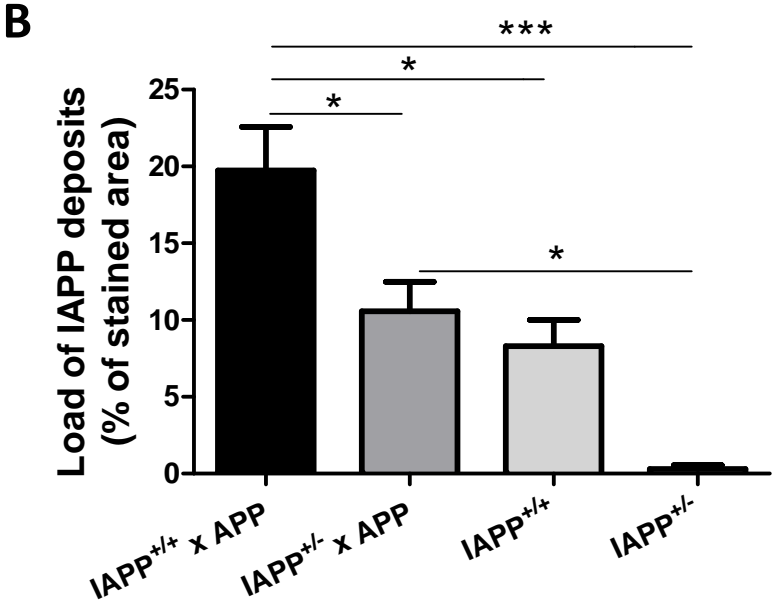

Suppl. Fig. 2

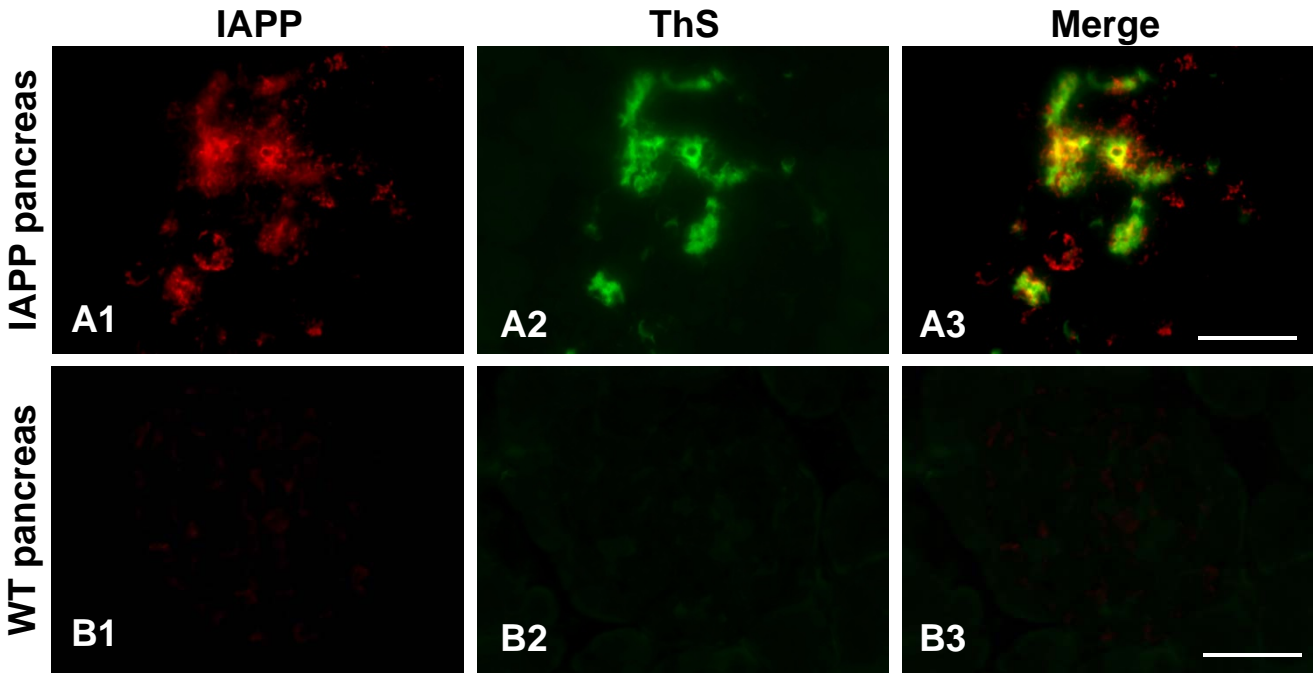

Supplement: NIHMS823458-supplement-1.pdf [file NIHMS823458-supplement-1.pdf]
